# Supplementary material for: Continuous Multimodality Monitoring in Children after Traumatic Brain Injury—Preliminary Experience
Source: PubMed Central journal article supplement (PMC4792535; doi:10.1371/journal.pone.0148817), 2016-03-15
Supplement: pone.0148817.s001.pdf [file pone.0148817.s001.pdf]

# Protocol for managing paediatric severe traumatic brain injury

## TARGETS

- SpO<sub>2</sub> >97%, PaO<sub>2</sub> >9kPa, PCO<sub>2</sub> 4.5-5 kPa
- Temp < 37°C, Glucose 4-7 mmol/l
- Serum Sodium > 140 mmol/l

## ICP/ CPP

| Age (yr) | ICP (mm Hg) | CPP (mm Hg) |
|----------|-------------|-------------|
| <3       | 5-15        | 40          |
| 4-7      | 15-20       | 40-50       |
| >8       | < 20        | 50-60       |

## *Stage A*

- Nurse 30° head up
- Ensure no venous obstruction to neck
- Sedation:
  - Midazolam: 50-300 µg/kg/hr
  - Fentanyl: 1-3 µg/kg/hr *or*
  - Morphine: 20-80 µg/kg/hr
- Paralysis:
  - Atracurium: 300-600 µg/kg/hr *or*
  - Vecuronium: 50-100 µg/kg/hr
- Anticonvulsants: Phenytoin 15 mg/kg  
(depressed #, seizures)
- Antibiotics: none for CNS reasons unless discussed with neurosurgeons
- Ventilation: TV 6-8 ml/kg & rate to keep pCO<sub>2</sub> in target range, no hyperventilation

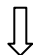

## ICP/ CPP targets not met? *Stage B*

- 5% saline 2-4 ml/kg  
(can be repeated but plasma osm < 320) *or*  
Mannitol 20% 2 ml/kg
- Ventilation pCO<sub>2</sub> ~ 4.5 kPa
- Hypothermia: temperature 35°C
- External ventricular drain if feasible
- Consider anticonvulsants if not already given

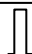

## ICP/ CPP targets not met? *Stage C*

- Discuss with PICU consultant/ neurosurgery team and decide either
- Thiopentone 2 mg/kg/hr to achieve burst suppression (cfm/ continuous EEG) *or*
- Consider decompressive craniectomy

## Patients Details

### SPINE

*Consider unstable until cleared by the neurosurgeons*  
Use sandbags/tape/collar to immobilise

### ICP Target:

.....mm Hg

Signature: .....

Date:.....

### CPP Target:

.....mm Hg

Signature: .....

Date:.....

### If targets not met:

- Consider repeat CT scan
- Consider recalibrating the probe

Neurosurgical bleep: 156-0358

PICU on-call bleep: 152-001
